1 **All-optical manipulation of the *Drosophila* olfactory system.**

2 Mirko Zanon<sup>1,2\*</sup>, Damiano Zanini<sup>1,+</sup>, Albrecht Haase<sup>1,2\*</sup>

3 <sup>1</sup> Center for Mind/Brain Sciences, University of Trento, Rovereto, Italy

4 <sup>2</sup> Department of Physics, University of Trento, Trento, Italy

5 + current address: Neurobiology and Genetics, Biocenter, University of Würzburg, Würzburg,  
6 Germany

7 \*correspondence to: [mirko.zanon@unitn.it](mailto:mirko.zanon@unitn.it) , [albrecht.haase@unitn.it](mailto:albrecht.haase@unitn.it)

8 **Abstract**

9 Thanks to its well-known neuroanatomy, limited brain size, complex behaviour, and extensive  
10 genetic methods, *Drosophila* has become an indispensable model in neuroscience. A vast  
11 number of studies have focused on its olfactory system and the processing of odour  
12 information. Optogenetics is one of the recently developed genetic tools that significantly  
13 advance this field of research, allowing to replace odour stimuli by direct neuronal activation  
14 with light. This becomes a universal all-optical toolkit when spatially selective optogenetic  
15 activation is combined with calcium imaging to read out neuronal responses. Initial  
16 experiments showed a successful implementation to study the olfactory system in fish and  
17 mice, but the olfactory system of *Drosophila* has been so far precluded from an application.  
18 To fill this gap, we present here optogenetic tools to selectively stimulate functional units in  
19 the *Drosophila* olfactory system, combined with two-photon calcium imaging to read out the  
20 activity patterns elicited by these stimuli at different levels of the brain. This method allows  
21 to study the spatial and temporal features of the information flow and reveals the functional  
22 connectivity in the olfactory network.

23 **Keyword**

24 *Drosophila*, optogenetics, olfactory system, glomeruli, GCaMP, ChR2-XXL, functional  
25 connectivity, two-photon imaging, neural networks.

26

## 27 Introduction

28

29 All animals use different sensory modalities to perceive the surrounding environment. This  
30 includes vision, hearing, taste, smell, and touch. Between these, olfaction is for many insects  
31 the most important sensory modality to ensure survival and reproductive success.

32 Thanks to recent advances in physiology and genetics, much is known about how *Drosophila*  
33 *melanogaster* encodes odour stimuli in its brain. In fact, it is one of the most used animal  
34 models in neuroscience to investigate the logic of olfaction <sup>1</sup>; the reasons are several:  
35 anatomical similarity to the vertebrate olfactory system, reduced brain dimensions facilitating  
36 the optical access, precise description of synaptic connections, availability of a vast set of  
37 genetic tools for its manipulation, and a large number of paradigms to test olfactory  
38 perception.

39 The majority of olfactory sensilla are located at the distal part of the antenna. Olfactory  
40 receptor neurons (ORNs) within the sensilla extend their axons to the first olfactory centres  
41 in the brain, the antennal lobes (ALs), the analogue of the olfactory bulbs (OBs) in mammals.  
42 Specifically, the ORN axons terminate in spherical substructures, the glomeruli. 43 glomeruli  
43 are present in an AL and each one receives input from a single type of olfactory receptors <sup>2</sup>;  
44 local interneurons (LNs) interconnect different glomeruli <sup>3</sup> and projection neurons (PNs)  
45 forward the glomerular activity to higher brain centres. Odour stimuli produce stereotypical  
46 glomerular activation patterns in the ALs, which can be observed via calcium imaging in fruit  
47 flies <sup>4</sup>, but also in other insects like bees <sup>5</sup> as well as in the mammalian OBs <sup>6</sup>. Both spatial and  
48 temporal degrees of freedom contribute to odour coding <sup>7-12</sup>. PN axons connect to higher  
49 processing centres like the calyces of the mushroom bodies (MBs) and dorso-lateral regions  
50 of the protocerebrum called lateral horns (LHs). This information transfer from ALs to higher  
51 centres has been intensively studied <sup>13-15</sup>. At the MBs level, information is read out by ca.  
52 2000 Kenyon cells (KCs) which are sparsely activated without an evident stereotypical spatial  
53 patterning. KCs integrate different combinations of inputs, each from ca. 7 PNs, maximizing  
54 stimulus discrimination performance <sup>16</sup>.

55 A large effort has currently been made to study connectivity between and within these brain  
56 regions. Besides spectacular results showing anatomical connections down to the single

57 synapse<sup>17</sup>, functional connectivity is studied with various approaches, *e.g.* by combining Ca-  
58 imaging with bath-applied ATP pulses<sup>18</sup>, electrophysiological stimulations and readout of  
59 single LNs and PNs<sup>19</sup>, or by correlating spontaneous activity<sup>20</sup>. First efforts are made to  
60 precisely connect anatomical and functional data<sup>21</sup>. These and other studies gave a good  
61 insight into connectivity properties, however, there is one bottleneck in all works which  
62 investigate the olfactory system at the network level: how to combine single network node  
63 stimulation with whole-brain readout. While in electrophysiological studies, to perfectly  
64 shape single neuron stimuli, the response can be recorded only in a few neurons, whole-brain  
65 studies use spontaneous activity to determine the resting state connectivity or use odour  
66 stimuli which usually elicit responses in a large number of input neurons cross-linked in the  
67 AL, typically producing a broad activity pattern.

68 To shed light on the olfactory network and its coding mechanisms, it would be of great  
69 advantage to access also single network nodes and follow the produced activation in space  
70 and time. This would help to explore the direct and indirect coupling between single cells,  
71 enabling systematic studies on how single odour properties are encoded in this high-  
72 dimensional system.

73 The selective interaction with single neurons became feasible by the experimental  
74 implementation of optogenetics, a technique based on the integration of light-sensitive ion  
75 channels (opsins) into the cell membrane to modulate its ionic permeability upon illumination  
76 with specific wavelengths<sup>22</sup>. Since the first proof-of-principle experiments<sup>23–25</sup>, scientists  
77 have developed a large toolset of opsins to excite or inhibit single neurons<sup>26,27</sup>. In  
78 combination with spatially and temporally resolved readout, *e.g.* via calcium imaging, this  
79 provides a powerful all-optical approach to study neuronal networks<sup>28,29</sup>.

80 However, the combined use of optogenetics and calcium imaging is experimentally  
81 challenging: besides the costs and complexity of integrating and controlling two laser light  
82 sources (one for the activation, one for the readout), the spectral overlap between the  
83 molecules responsible for optical activation and calcium activity detection represents one of  
84 the biggest problems<sup>24</sup>. The best performing activity sensors in transgenic animals, the  
85 genetically encoded calcium indicators GCaMP6<sup>30</sup>, GCaMP7<sup>31</sup>, and GCaMP8<sup>32</sup> are  
86 overlapping with the most common opsin, channelrhodopsin ChR2<sup>24</sup>. Wavelength-shifted

87 opsins and calcium sensors are less efficient<sup>33</sup> but still widely chosen to avoid this problem  
88 <sup>34</sup>. Alternative ways to minimize this cross-talk in an all-optical activation and readout system  
89 would be the targeting of spatially separated areas for stimulation and imaging or an  
90 optimization of laser powers for the two different tasks<sup>35–39</sup>.

91 By now, the power of all-optical neuronal manipulation and imaging has been successfully  
92 demonstrated in different animal models and various parts of the brain<sup>40</sup>. The applicability  
93 of these setups was extended by advanced stimulus delivery and imaging techniques<sup>41–45</sup>.  
94 Also in *Drosophila*, the all-optical approach has been applied to various brain regions and  
95 neuronal populations<sup>27,46</sup>. But among those, only a single work concentrated on the olfactory  
96 system of adult flies. The experimental approach was, contrary to this work, the stimulation  
97 of a single type of ORN which was targeted by selective expression of ChR2 and not by spatially  
98 selective illumination<sup>47</sup>. In a further study in *Drosophila* larvae, ChR2 was expressed in all  
99 ORN, but also here light patterning was not applied, since a response of all ORN was desired  
100 <sup>48</sup>. Thus, to our knowledge, the here presented methods are the first, that show how to dissect  
101 the olfactory network in flies via a selective illumination of single glomeruli. However, the  
102 benefits of such an approach within the olfactory system have already been demonstrated in  
103 fish<sup>49</sup> and mice<sup>50–52</sup>.

104 To fill this gap and to solve the aforementioned limitations, we implemented optogenetics to  
105 selectively stimulate functional units in the *Drosophila* olfactory system via a diode laser and  
106 to read out the activation via two-photon fluorescence microscopy providing high resolution  
107 and penetration depth. We present new transgenic lines of *Drosophila*, expressing a  
108 combination of the best-performing actuators and sensors, the opsin ChR2-XXL<sup>53</sup> at the level  
109 of the ALs and the calcium indicator GCaMP6 pan-neuronally.

110 Our results demonstrate that these flies qualify as a reliable and versatile tool to stimulate  
111 specific nodes in the primary olfactory network while monitoring the associated neuronal  
112 response throughout the brain *in vivo*.

## 113 Results

### 114 1. Antennal lobe stimulation and olfactory pathway connectivity

115 To validate our all-optical system and transgenic model, we monitored the entire fly brain  
116 activity, stimulating only one antennal lobe.

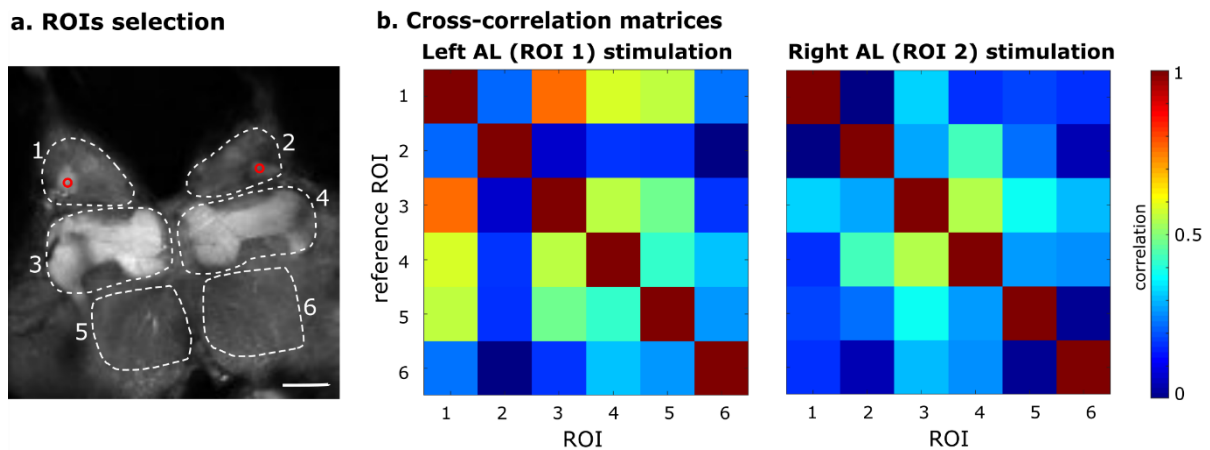

117 **Figure 1. Whole brain imaging.** a) Cross-section fluorescence image of a whole brain, with different ROIs  
118 delimiting brain areas involved in olfactory processing (1,2 ALs; 3,4 MBs; 5,6 posterior brain areas). The red  
119 circles represent the two different stimulation points (in two different experiments). Scale bar 80  $\mu$ m. b) Cross-  
120 correlation analysis between different areas of the fly brain, following an antennal lobe stimulation. The  
121 Pearson's correlation coefficient is represented as a colour code. The results show an average over 3 stimulus  
122 repetitions.

123 The correlations between the response signals of different brain areas were calculated (*Fig.*  
124 *1b*), including the left and right ALs, the left and right MBs and the left and right posterior  
125 brain (superior medial protocerebrum) (*Fig. 1a*). In all cases, correlations are higher for the  
126 left side stimulation, which is likely influenced by the specific area that was targeted. Looking  
127 at the ipsilateral correlations, the largest ones are those between the stimulated AL and the  
128 ipsilateral MB ( $r = 0.79 \pm 0.09$  (mean  $\pm$  sem) for the left,  $r = 0.51 \pm 0.10$  for the right side  
129 stimulation); they then reduce between stimulated AL and posterior brain ( $r = 0.60 \pm 0.32$  for  
130 the left and  $r = 0.17 \pm 0.06$  for the right side). Of major interest are the contralateral couplings  
131 which are relatively low between antennal lobes ( $r = 0.30 \pm 0.30$  under left stimulation,  $r =$   
132  $0.13 \pm 0.29$  under right stimulation) and increase substantially between ALs and contralateral  
133 MBs ( $r = 0.62 \pm 0.20$  under left stimulation,  $r = 0.38 \pm 0.24$  under right stimulation) and between  
134 both MBs ( $r = 0.60 \pm 0.25$  under left stimulation,  $r = 0.61 \pm 0.09$  under right stimulation).

## 135 2. Single glomerulus stimulation and power threshold

136 To explore the resolution of our setup and test the feasibility to solely stimulate neurons  
137 within a single glomerulus of interest, we stimulated three spots consecutively, targeting two  
138 different glomeruli and, as a control, an area outside the AL.

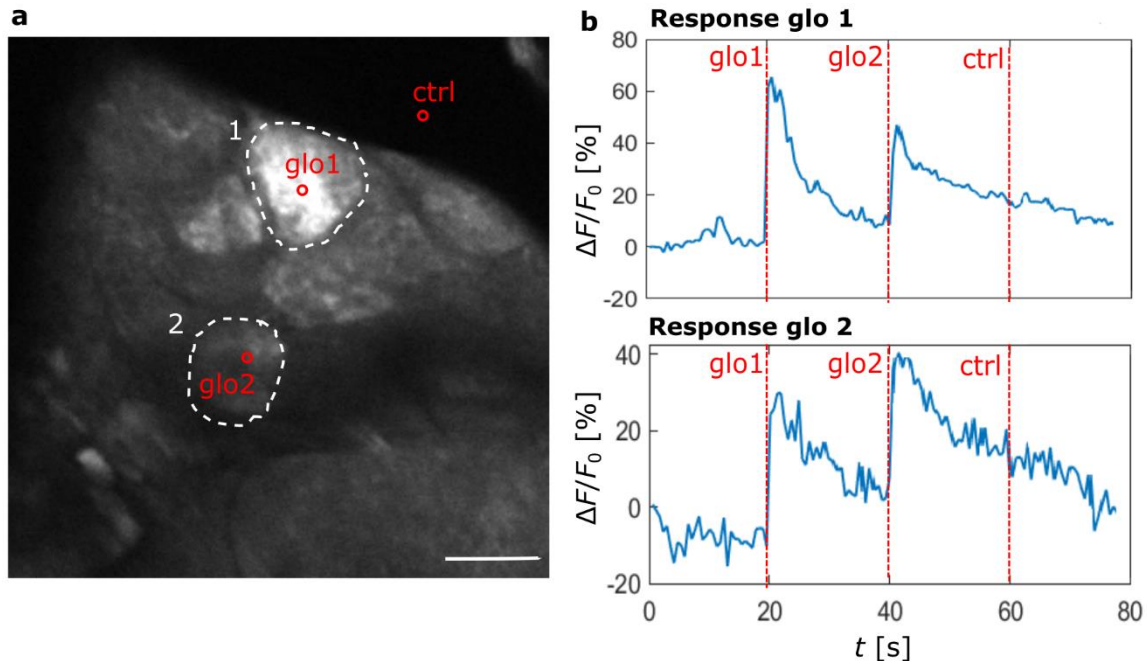

139 **Figure 2. Glomeruli stimulation.** a) Cross-section image of an AL, highlighting two glomeruli (white ROIs) and  
140 three stimulation points (red circles). Scale bar 20  $\mu\text{m}$ . b) Temporal response curves averaged over the two  
141 different ROIs (glomerulus 1 above and glomerulus 2 below); red vertical lines indicates the times of stimulation:  
142 the first stimulation targets glomerulus 1, the second glomerulus 2, and the third a point outside the AL (ctrl).  
143 The interval between stimuli is 20 s.

144 The temporal response curves manifest that the stimulus elicits a strong response signal in  
145 the targeted glomerulus while stimulating the control region outside the AL does not elicit  
146 any glomerular activity. However, when targeting one glomerulus, a reduced response was  
147 visible also in the other, non-targeted glomerulus. The comparable distance to the control  
148 suggests that this might not be a direct activation due to a limited resolution of the activation  
149 pattern, but rather an excitatory coupling between glomeruli via local neurons<sup>54</sup>.

150 To clarify this, we tested neuronal responses in the neighbouring regions of the stimulated  
151 glomerulus. A single glomerulus was repeatedly activated with increasing blue laser power.  
152 The time-dependent response curve shows a strong activation of this glomerulus already for  
153 the lowest power  $p_1 = 0.02$  mW (orange curve in Fig. 3b). An increase of the activation by  
154 exposure to higher powers seems to lead always to a similar jump of the signal; the total

155 increase derives from the fact that previous stimulus activity persists. After  $p_5$  a saturation  
156 effect can be observed. The nearest neighbour glomerulus (blue curve in *Fig. 3b*) shows no  
157 activation for the lowest power  $p_1$ , followed by a slow increase with increasing stimulus  
158 intensity until  $p_4$  when its response becomes comparable to the targeted glomerulus. An even  
159 clearer picture is drawn by a seeded cross-correlation map (*Fig. 3c*) that shows an extremely  
160 coherent signal within the stimulate glomerulus, with  $r \approx 1$  that abruptly drops to  $r \approx 0$  at the  
161 glomerular boundary, proving the activation is limited to a single glomerulus for stimulation  
162 with  $p_1$ .

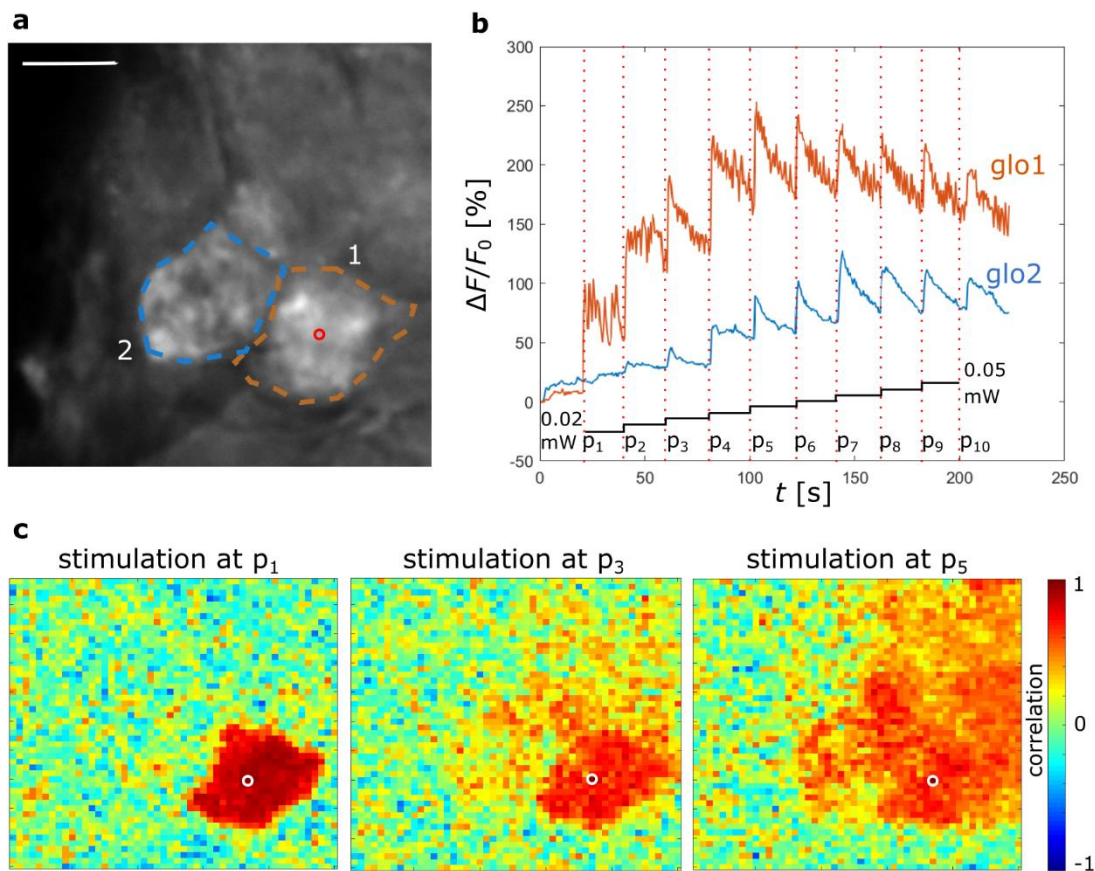

163

164 **Figure 3.** *Increasing power stimulation.* a) ROIs selection: glomerulus 1, orange ROI; glomerulus 2, blue ROI; the  
165 stimulation point in glomerulus 1 is marked by a red circle, scale bar 20  $\mu\text{m}$ . b) Temporal response profile  
166 averaged over each of the two ROIs during 10 stimulations with ascending blue laser power from  $p_1 = 0.02$  mW  
167 to  $p_{10} = 0.05$  mW; black steps show the progressive increase in power for the different 10 stimulations. c) Three  
168 examples of seed-based correlation maps with respect to the stimulation point for three stimulations powers  
169  $p_1, p_3,$  and  $p_5$ .

170 When the activation power is increased, a progressive extension of activation to neighbouring  
171 glomeruli can be observed (*Fig. 3c*).

172 **3. Elicited coupled oscillations**

173 Our initial findings also showed interesting phenomena that go beyond the activation of a  
174 tonic response limited to the stimulus period which then propagates to higher brain centres.

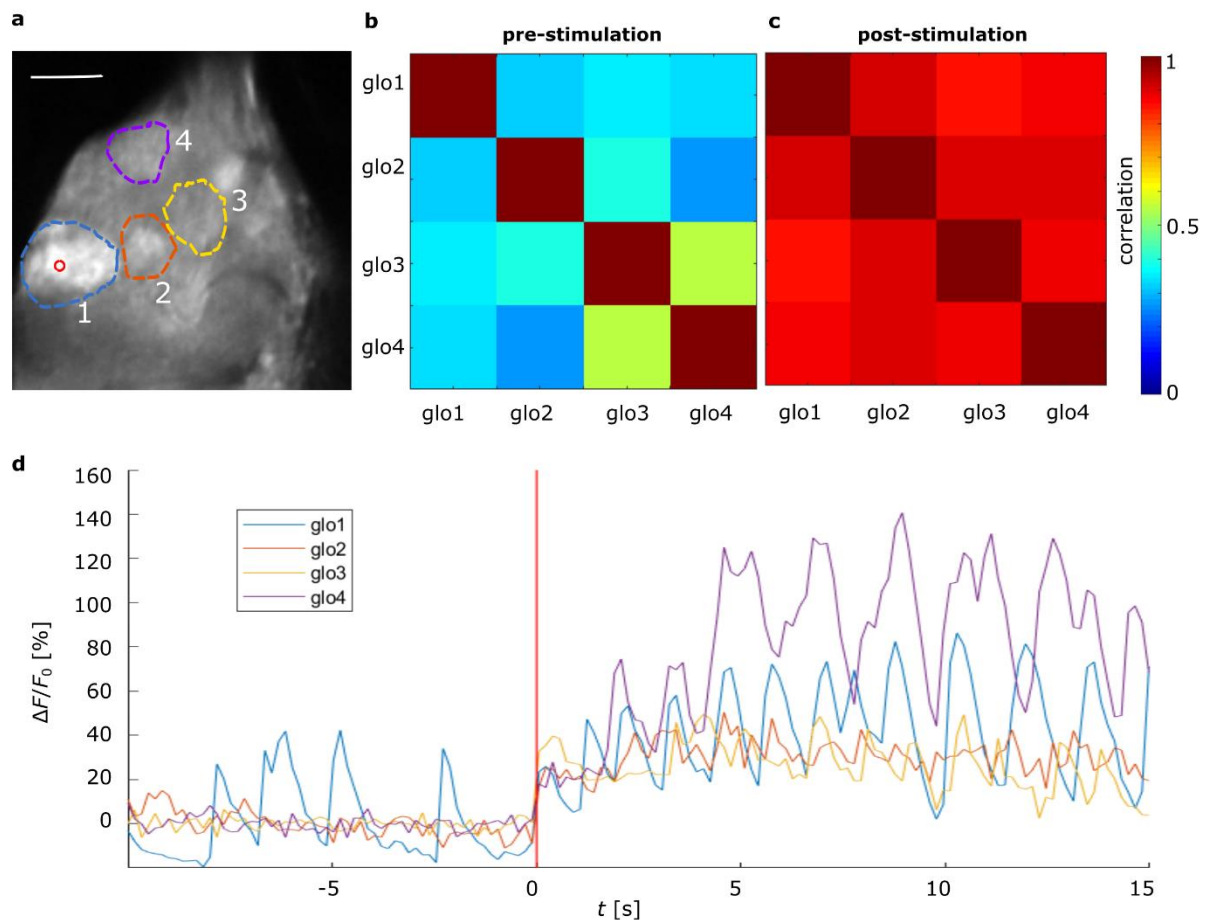

175 **Figure 4.** *Oscillatory glomerulus stimulation.* a) Antennal lobe with ROIs on different glomeruli, and an activation  
176 point within glomerulus 1 labelled by a red circle, scale bar 20 $\mu$ m. Cross-correlation matrices in time windows  
177 of 10 s before (b) and after (c) the stimulation. d) Temporal activity profiles before and after the 200 ms  
178 stimulation, the latter is marked by the red vertical line.

179 The example reports the activation of a single glomerulus (glomerulus 1 in *Fig. 4a*) which  
180 shows spontaneous activity before the stimulus (*Fig. 4d*, blue line). After the stimulation, this  
181 glomerulus maintains its oscillatory activity, although with slightly increased intensity.  
182 However, most interestingly, after the stimulation, other glomeruli start to respond in high  
183 synchrony to the targeted glomerulus (see correlation matrices of *Fig. 4b*), partially with very  
184 high amplitudes that keep increasing until long after the stimulus. The synchrony of these  
185 oscillations is nicely visible in *Supplementary Video S1*.

186 To investigate the dynamics of these oscillations more in detail, a time-frequency analysis of  
187 coherence was performed (*Fig. 5*). The example shows the coherence between the



188 spontaneously oscillating glomerulus that was stimulated (glomerulus 1 in *Fig. 4a*) and its  
189 neighbouring glomerulus (ROI 2 in *Fig. 4a*).

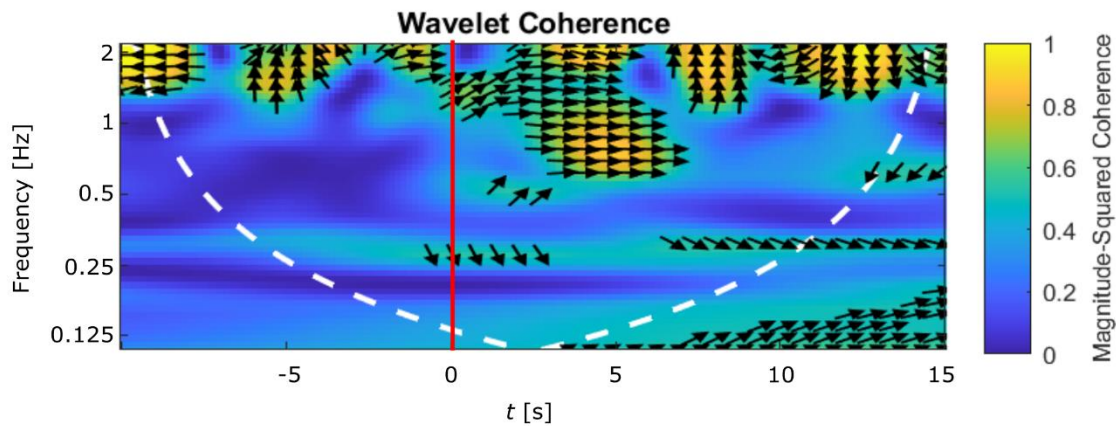

190  
191 **Figure 5.** Time-frequency analysis of *Exp. 3*. Magnitude-squared wavelet coherence between the targeted  
192 glomerulus 1 and glomerulus 2 of *Fig. 4a*. Stimulus at the red vertical line; the white dotted line represents the  
193 cone of influence and the arrow directions indicate the phase shift between both signals.

194 The results suggest fluctuating coherences above 1 Hz with an arbitrarily fluctuating phase  
195 before the stimulus. After the stimulus, a new component comes up between 0.5 and 1 Hz  
196 where both signals are well in phase, manifested by the right-pointing vector, suggesting  
197 coherent oscillations around this frequency. This is the frequency band in which the collective  
198 oscillations are observed (*Fig. 4d, Supplementary Video S1*).

## 199 Discussion

200 In this work, we propose and implement an all-optical approach to study the *drosophila*  
201 olfactory system. We provide all the necessary tools to dissect this neuronal network, with  
202 applicability on different scales, from the entire brain to single network nodes.

203 To optimize neuronal activation and response detection efficiency, two of the best  
204 performing molecules (ChR2-XXL and GCamp6) were used, which so far were rarely expressed  
205 in combination, given their spectral overlap.

206 The method was first tested at the scale of the entire brain while stimulating a small region  
207 within one single antennal lobe. The elicited response patterns were analyzed by looking at  
208 the temporal correlations between the activity in different brain regions. The correlation  
209 amplitudes (*Fig. 1b*) confirm the well-known pathways of the olfactory information, *i.e.*

210 information is directly forwarded by projection neurons into the ipsilateral mushroom body  
211 and lateral horn. This reflects in correlations of 0.8/0.5 (left/right stimulation, respectively)  
212 between AL and MB of the same hemisphere. An important difference is visible in the  
213 homotopic connectivity: some correlations between contralateral antennal lobes are present,  
214 but with smaller amplitudes of 0.3/0.1 (left/right stimulation, respectively). This confirms how  
215 in *drosophila*<sup>55,56</sup>, differently from other insect species<sup>57</sup>, ORNs target also the homotopic  
216 glomerulus in the contralateral AL. The fact that in these regions the correlations are not as  
217 high as the ipsilateral ones with the MBs is likely due to the different local network structures  
218 created by modulatory interneurons that couple ipsilateral glomeruli. In honey bees, it was  
219 shown that also the antennal lobe output signals are therefore not fully bilaterally symmetric  
220<sup>58</sup>. Contralateral correlations increase substantially between MBs to 0.6/0.6 (left/right  
221 stimulation, respectively), confirming the enhanced bilateral coupling of these neuropils<sup>59</sup>.

222 To reveal more details on these couplings, the system needs to work at an increased spatial  
223 and temporal resolution, which we tested thereafter. Experiments on targeting individual  
224 glomeruli demonstrated that the choice of laser power is the most crucial factor for the  
225 selectivity of glomerular stimulation (*Fig. 3*). With high spatial resolution and precise control  
226 of the activation laser power, a correlation measurement shows how to find an optimal  
227 threshold to elicit activation perfectly confined to the targeted glomerulus (*Fig. 3c*). At the  
228 same time, it showed how the massive coupling within each glomerulus produced perfect  
229 correlations across the glomerular area. The abrupt decay to zero at the glomerular  
230 boundaries is proving that the above mentioned spectral overlap between opsin and the  
231 calcium-sensor could be well controlled by keeping the two-photon laser intensity reasonably  
232 low. The unwanted re-excitation of the opsin during the imaging phase would have been  
233 visible as a background in the correlation analysis.

234 When the activation laser power was successively increased, the neuronal activation reached  
235 over into neighbouring glomeruli, likely due to the laser intensity surpassing the activation  
236 threshold in more and more neighbouring areas. Although this spillover has to be avoided in  
237 protocols targeting single glomeruli, there are also possible applications for it. It has been  
238 shown that glomeruli responsive to specific odours tend to cluster topographically; moreover,  
239 similar chemical classes of odours and even response profiles of odours with equal hedonic

240 valence highly overlap<sup>60</sup>. It follows that, just by intensity tuning, a single optogenetic  
241 activation could produce activity patterns mimicking specific odours, broader odour classes,  
242 or even odour valence properties. This may also allow comparing the fundamentally different  
243 odour coding strategies of combinatorial coding versus single glomerulus labelled lines<sup>15,61</sup>  
244 by directly transitioning between these patterns. The corresponding laser powers depend on  
245 various parameters, among those the sample staining, the imaging depth, the type and the  
246 position of the targeted glomeruli: thus, a calibration needs to be performed before each  
247 experiment by the presented experimental scheme.

248 Besides measuring the static coupling between neural network nodes based on average  
249 response amplitudes, we showed that this setup allows accessing also dynamical features of  
250 this coupling. The presented example (*Fig. 4* and *Supplementary Video S1*) showed how  
251 optical stimulation hardly changed the activity in a stimulated glomerulus that was already  
252 showing a spontaneous response, but at the same time caused a long-lasting coupling  
253 between the glomerulus and its neighbours (which again might have been due to coupling via  
254 excitatory interneurons<sup>54</sup>). This highlights the potential of this approach for studying also the  
255 dynamical coupling under well-defined conditions, limiting the excitation to a single  
256 glomerulus. An odour stimulus would have likely activated several glomeruli, making it  
257 impossible to identify the origin of such synchronization.

258 These are proof-of-principle experiments that show how optogenetics can be used as a  
259 powerful tool to study signal propagation and functional connectivity in the *Drosophila*  
260 olfactory system. It will be possible to reconstruct the functional connectome of different  
261 brain regions with odour-independent optogenetic stimulation of single network nodes. It  
262 allows, moreover, to follow the dynamics of information propagation from single, well-  
263 defined sources.

## 264 **Methods**

### 265 **Drosophila lines**

266 All fly lines used in this study were reared on standard cornmeal-agar medium with yeast, at  
267 20°C in 60% humidity-controlled chambers under 12 hours light/dark cycles. The fly lines

268 were obtained from the Bloomington Drosophila Stock Center: *orco-GAL4* (#26818); *UAS-*  
269 *ChR2-XXL* (#58374); *nSyb-LexA* (#52247); *LexAop-GCaMP6m* (#44275).

270 The flies used in the experiments were obtained by combining both Gal4-*UAS* and LexA-  
271 *LexAOP* binary systems into one fly, simultaneously performing two manipulations of gene  
272 expression *in vivo*. In our tests we used 5 days old flies *nSyb-LexA/UAS-ChR2-XXL; LexAop-*  
273 *GCaMP6m/orco-GAL4* which express the channelrhodopsin in olfactory sensory neurons and  
274 the calcium sensor in all the neurons of the brain.

275 Correct and precise expression of transgenes was checked by performing  
276 immunohistochemistry on dissected brains, following a standard protocol<sup>62</sup> using primary  
277 antibodies specific to GCaMP (chicken anti-GFP, Thermo Fisher Scientific) and ChR (mouse  
278 anti-ChR2 supernatant 1:1, 15E2, mfd Diagnostics). Secondary antibodies were goat anti-  
279 chicken Alexa Fluor-488 and goat anti-mouse 1:250, respectively (Thermo Fisher Scientific).  
280 *Fig. 6b,c,d* show the expression levels in the fly brain. The opsin expression is limited to the  
281 antennal lobes (*Fig. 6b*, magenta in *Fig. 6d*), the calcium sensor is found in all neurons (*Fig.*  
282 *6c*, green in *Fig. 6d*).

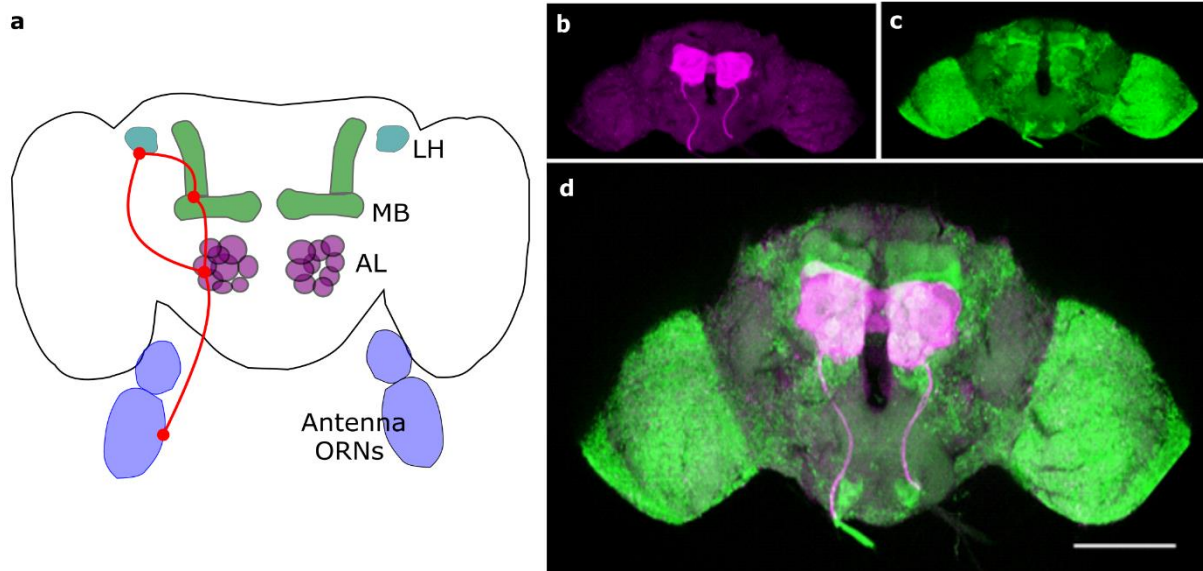

283

284 **Figure 6.** Fly brain and molecules expression. a) Scheme of the fly olfactory system. Odours are received by the  
285 odour receptor neurons (ORNs) at the level of the antennae. The activation is passed to the antennal lobes (ALs)  
286 and further to the mushroom bodies (MBs) and the lateral horns (LHs). (b) Images of a dissected and fixed fly  
287 brain, marked with antibody anti-ChETA (b, magenta) for ChR2-XXL identification and anti-GFP (c, green) for  
288 calcium sensor GCaMP identification. The opsin is expressed in the antennal lobes, GCaMP pan-neuronally. c)  
289 Merge of (b) and (c). Scale bar: 100  $\mu$ m.

## 290 **Drosophila preparation**

291 Sample preparation and drosophila brain exposure are adapted from a well-established  
292 procedure<sup>63,64</sup>.

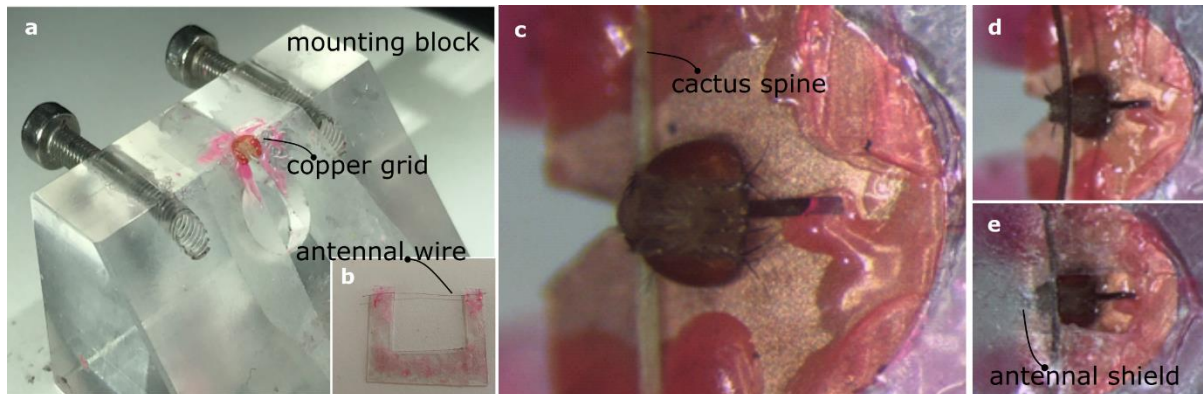

293

294 **Figure 7. Drosophila preparation.** a) Picture of the plexiglass mounting block, with the copper disc on the top.  
295 (b) Mounted wire that is used to position the antennae. c) The drosophila is blocked with a cactus spine after  
296 it's inserted in the copper disc by the neck. d) The antennae are pushed by the wire (b). e) antennae are covered  
297 with a plastic shield.

298 1. Custom-made plexiglass mounting blocks (*Fig. 7a*) are used to allow easy mounting  
299 and dissection of the fly, blocking the animal by the neck. A copper disc (125  $\mu$ m slot, Copper  
300 3.05mm, Agar Scientific) is glued and levelled on the block to create a "collar", with the slit  
301 centred above the hole of the block. The flaps on both sides of the slit are folded down to stay  
302 close to the block surface.

303 2. Flies of the appropriate genotype are anaesthetized by cooling on ice, females are  
304 chosen for their bigger dimensions. Holding the fly by the wings, it is introduced into the  
305 mounting block by the neck and rotated until it is looking downwards. When the head is  
306 levelled with the top of the block, the fly is blocked with a cactus spine above the proboscis  
307 and a drop of glue (Super Attak, Loctite) on the sides of the head (*Fig. 7c*).

308 3. Fly antennae are pushed away from the head with a thin wire (attached to a plastic U-  
309 shaped coverslip, across the top of the "U") (*Fig. 7b* and *7d*). This wire is inserted in the  
310 cuticular fold between head and antennae and the screws built into the mounting block (*Fig.*  
311 *7a*) are used to gently adjust the wire position.

312 4. An antennal shield composed of a circular slot in a not-sticky piece of tape surrounded  
313 by a plastic coverslip is placed on the top of the head. The slit has the same dimensions as the  
314 head, not extending beyond the eyes. This shield prevents the preparation from leaking,  
315 keeping the antennae completely dry (*Fig. 7e*).

316 5. The gap between the tape and the cuticle is sealed with two-component silicon (Kwik-  
317 Sil, WPI), in a thin layer; a drop of *Drosophila* Ringer's solution (130 mM NaCl, 5 mM KCl, 2  
318 mM MgCl<sub>2</sub>, 2 mM CaCl<sub>2</sub>, 36 mM saccharose, 5 mM HEPES, pH 7.3) is then placed on the head.

319 6. The head cuticle is cut using a sapphire blade (Single/Double Edge Lancet, 1.00 mm  
320 wide, angled 45°, WPI), carving along the borders of the eyes and across the ocelli on the  
321 back. After removing gently the piece of cuticle, glands and trachea are removed with fine  
322 forceps (Dumont Tweezers #5SF, 0.025 × 0.005mm, WPI), and the fly's brain is ready to be  
323 imaged.

### 324 **Microscopy setup**

325 Our optical setup consists of a two-photon microscope (Ultima IV, Bruker) combined with a  
326 femtosecond pulsed Ti:Sa laser (MaiTai DeepSee, Spectra-Physics), tunable between 690-  
327 1040 nm. The output power is controlled by a Pockels cell. Two-photon imaging of GCaMP  
328 worked best at a wavelength of 940 nm.

329 The beam is scanned in the plane by galvo-mirrors and in height by a fast piezo scanner (150  
330 μm travel range) and a stepper motor (travel range of 25 mm), which move the water-  
331 immersion objective (20× NA 1.0, Olympus). Fluorescence is separated by a dichroic beam-  
332 splitter (660 nm, ChromaTechnology), filtered by an IR-blocking filter (< 650 nm) and divided  
333 by dichroic beam-splitter (575 nm) into two channels equipped with two different band-pass  
334 filters (607/45 nm and 525/70 nm, ChromaTechnology) and detected by multi-alkali PMT  
335 detectors (Hamamatsu). The complete setup is placed on an air-damped optical table (RS4000  
336 Newport).

337 To stimulate the opsin, an additional diode laser emitting at 473 nm with a maximum output  
338 power of 100 mW (iBeam Smart 473 nm, Toptica Photonics) is overlapped with the imaging  
339 beam. In the experiment, the output power of the blue laser is always less than 0.05 mW and  
340 the stimulations are point-like, with a duration of 200 ms. All reported power values are  
341 measured over the entire beam after the objective. A notch filter (405/473-488/NIR m) blocks  
342 the blue light in the fluorescence detection arm. The blue laser spot dimensions (*i.e.* the limit  
343 for single point stimulation) are estimated by bleaching a homogeneous fluorescent sample  
344 (fluorescent marker pen on coverslip). The obtained point spread function doesn't exceed

345 5×5 μm<sup>2</sup> in the focal plane and has an extension of less than 20 μm along the axial direction.  
346 The activation scanning and the imaging beam is handled by the same galvo mirror pair,  
347 switching within 1 ms between the continuous 2D line-by-line scanning during imaging and  
348 random access scanning of a series of predefined activation points. Moreover, an optional  
349 spiralling over these points can be set to increase the exposed areas. As a compromise  
350 between spatial and temporal resolution, the imaging experiments are performed using  
351 128×128 pixels with a 5 Hz repetition rate. The microscope is controlled by the software  
352 PrairieView (Bruker).

### 353 ***In vivo* imaging**

354

#### 355 **1. Antennal lobe stimulation and olfactory pathway connectivity**

356

357 We monitored the entire fly brain activity, in response to the stimulation of a single  
358 antennal lobe; activation was performed either within the left AL or within the right one.  
359 The stimulation was a single-point blue-laser activation (red circle in *Fig. 1a*), with a power <  
360 0.03 mW for a duration of 200 ms. Activity propagation was quantified via correlation  
361 analyses between different brain areas (see below for a detailed description of the analysis).  
362 All results were averaged over three stimulus repetitions.

#### 363 **2. Single glomerulus stimulation and power threshold**

364 In a first experiment, three spots were stimulated consecutively, targeting two individual  
365 glomeruli and an area outside the AL. The sequence of stimulation was the following:  
366 glomerulus 1, 2, and a control point outside the AL, with a delay of 20 s between stimuli  
367 (*Fig. 2*). The stimulations were point-like, with a power  $p < 0.03$  mW for a duration of 200  
368 ms.

369 In a second experiment, a single glomerulus was repeatedly activated with increasing blue  
370 laser power (corresponding to powers ranging from  $p_1 = 0.02$  mW to  $p_{10} = 0.05$  mW; *Fig. 3*).  
371 The response intensity was measured with high resolution in the surrounding of the  
372 glomerulus. Seeded cross-correlation maps were constructed to monitor the correlations of

373 different AL areas with the activation point, at increasing power (see the following  
374 paragraph for detailed analysis description).

### 375 **3. Elicited coupled oscillations**

376 We activated a single glomerulus (glomerulus 1 in *Fig. 4a*) that was showing a spontaneous  
377 oscillatory activity before the stimulus. The stimulation was point-like, with a power < 0.03  
378 mW for a duration of 200 ms. A time-frequency analysis of the magnitude-squared  
379 coherence between the oscillatory signal of the targeted glomerulus and the surrounding  
380 ones was performed (*Fig. 5*).

### 381 **Analysis of fluorescence activity and data correlation**

382 Neuronal responses to stimulation are measured as the change in fluorescence  $\Delta F$  with  
383 respect to a baseline value  $F_0$  (average fluorescence before stimulation). All response data  
384 are normalized with respect to this baseline to allow comparison between different samples  
385 and subjects. The formula used for this purpose is:  $\Delta F/F_0 [\%] = (F - F_0)/F_0 * 100$ .

386 Image processing and data analysis were performed using custom scripts in Matlab (R2019,  
387 MathWorks). These include, besides the above-mentioned post-processing, correlation  
388 analyses between time series (*Fig. 1b, 4b*) and seed-based spatial correlation analyses  
389 between an activation point and its surrounding (*Fig. 3c*). Correlation analyses are based on  
390 *corrcoef* Matlab functions. Furthermore, a wavelet coherence analysis was performed (*Fig. 5*)  
391 to obtain a time-frequency plot of the magnitude-squared coherence between two signals  
392 (colour-coded) plus the time-dependent phase between the two signals (coded by arrows,  
393 horizontal forward-pointing meaning completely in phase). This analysis is based on  
394 *wcoherence* Matlab function.

395 All the aforementioned analysis were implemented into a custom graphic user interface  
396 (*Supplementary Fig. S1, S2 and S3*).



## 397 Bibliography

- 398 1. Kazama, H. Systems neuroscience in *Drosophila*: Conceptual and technical  
399 advantages. *Neuroscience* **296**, 3–14 (2015).
- 400 2. Fishilevich, E. & Vosshall, L. B. Genetic and functional subdivision of the *Drosophila*  
401 antennal lobe. *Curr. Biol.* **15**, 1548–1553 (2005).
- 402 3. Masse, N. Y., Turner, G. C. & Jefferis, G. S. X. E. Olfactory Information Processing in  
403 *Drosophila*. *Curr. Biol.* **19**, R700–R713 (2009).
- 404 4. Wang, J. W., Wong, A. M., Flores, J., Vosshall, L. B. & Axel, R. Two-photon calcium  
405 imaging reveals an odor-evoked map of activity in the fly brain. *Cell* **112**, 271–282  
406 (2003).
- 407 5. Galizia, C. G., Sachse, S., Rappert, A. & Menzel, R. The glomerular code for odor  
408 representation is species specific in the honeybee *Apis mellifera*. *Nat. Neurosci.* **2**,  
409 473–478 (1999).
- 410 6. Leon, M. & Johnson, B. A. Olfactory coding in the mammalian olfactory bulb. *Brain*  
411 *Res. Rev.* **42**, 23–32 (2003).
- 412 7. Martelli, C., Carlson, J. R. & Emonet, T. Intensity Invariant Dynamics and Odor-Specific  
413 Latencies in Olfactory Receptor Neuron Response. *J. Neurosci.* **33**, 6285–6297 (2013).
- 414 8. Paoli, M., Weisz, N., Antolini, R. & Haase, A. Spatially resolved time-frequency analysis  
415 of odour coding in the insect antennal lobe. *Eur. J. Neurosci.* **44**, 2387–2395 (2016).
- 416 9. Seth, A. K. Neural coding: Rate and time codes work together. *Curr. Biol.* **25**, R110–  
417 R113 (2015).
- 418 10. Laurent, G. Olfactory network dynamics and the coding of multidimensional signals.  
419 *Nat. Rev. Neurosci.* **3**, 884–895 (2002).
- 420 11. Laurent, G. Dynamical representation of odors by oscillating and evolving neural  
421 assemblies. *Trends Neurosci.* **19**, 489–496 (1996).
- 422 12. Paoli, M. *et al.* Neuronal response latencies encode first odor identity information  
423 across subjects. *J. Neurosci.* **38**, 0453–18 (2018).
- 424 13. Galizia, C. G. Olfactory coding in the insect brain: data and conjectures. *Eur. J.*  
425 *Neurosci.* **39**, 1784–1795 (2014).

- 426 14. Jeanne, J. M., Fişek, M. & Wilson, R. I. The Organization of Projections from Olfactory  
427 Glomeruli onto Higher-Order Neurons. *Neuron* **0**, 1–16 (2018).
- 428 15. Seki, Y. *et al.* Olfactory coding from the periphery to higher brain centers in the  
429 *Drosophila* brain. *BMC Biol.* **15**, 18–22 (2017).
- 430 16. Eichler, K. *et al.* The complete connectome of a learning and memory center in an  
431 insect brain. *bioRxiv* **548**, 175–182 (2017).
- 432 17. Berck, M. E. *et al.* The wiring diagram of a glomerular olfactory system. *Elife* **5**, 1–21  
433 (2016).
- 434 18. Yao, Z., Macara, A. M., Lelito, K. R., Minosyan, T. Y. & Shafer, O. T. Analysis of  
435 functional neuronal connectivity in the *Drosophila* brain. *J. Neurophysiol.* **108**, 684–  
436 696 (2012).
- 437 19. Huang, J., Zhang, W., Qiao, W., Hu, A. & Wang, Z. Functional connectivity and  
438 selective odor responses of excitatory local interneurons in *drosophila* antennal lobe.  
439 *Neuron* **67**, 1021–1033 (2010).
- 440 20. Mann, K., Gallen, C. L. & Clandinin, T. R. Whole-Brain Calcium Imaging Reveals an  
441 Intrinsic Functional Network in *Drosophila*. *Curr. Biol.* 1–8 (2017)  
442 doi:10.1016/j.cub.2017.06.076.
- 443 21. Turner, M. H., Mann, K. & Clandinin, T. R. The connectome predicts resting-state  
444 functional connectivity across the *Drosophila* brain. *Curr. Biol.* **31**, 2386–2394.e3  
445 (2021).
- 446 22. Fiala, A., Suska, A. & Schlüter, O. M. Optogenetic approaches in neuroscience. *Curr.*  
447 *Biol.* **20**, 897–903 (2010).
- 448 23. Zemelman, B. V., Lee, G. A., Ng, M. & Miesenböck, G. Selective photostimulation of  
449 genetically chARGed neurons. *Neuron* **33**, 15–22 (2002).
- 450 24. Nagel, G. *et al.* Channelrhodopsin-2, a directly light-gated cation-selective membrane  
451 channel. *Proc. Natl. Acad. Sci.* **100**, 13940–13945 (2003).
- 452 25. Boyden, E. S., Zhang, F., Bamberg, E., Nagel, G. & Deisseroth, K. Millisecond-timescale,  
453 genetically targeted optical control of neural activity. *Nat. Neurosci.* **8**, 1263–1268  
454 (2005).

- 455 26. Yizhar, O., Fenno, L. E., Davidson, T. J., Mogri, M. & Deisseroth, K. Optogenetics in  
456 neural systems. *Neuron* **71**, 9–34 (2011).
- 457 27. Simpson, J. H. & Looger, L. L. Functional imaging and optogenetics in drosophila.  
458 *Genetics* **208**, 1291–1309 (2018).
- 459 28. Packer, A. M., Russell, L. E., Dalglish, H. W. P. & Häusser, M. Simultaneous all-optical  
460 manipulation and recording of neural circuit activity with cellular resolution in vivo.  
461 *Nat. Methods* **12**, 140–146 (2015).
- 462 29. Saber, W. A., Gasparoli, F. M., Dirks, M. G., Gunn-Moore, F. J. & Antkowiak, M. All-  
463 optical assay to study biological neural networks. *Front. Neurosci.* **12**, 1–12 (2018).
- 464 30. Chen, T.-W. *et al.* Ultrasensitive fluorescent proteins for imaging neuronal activity.  
465 *Nature* **499**, 295–300 (2013).
- 466 31. Dana, H. *et al.* High-performance calcium sensors for imaging activity in neuronal  
467 populations and microcompartments. *Nat. Methods* **16**, 649–657 (2019).
- 468 32. Zhang, Y. *et al.* Fast and sensitive GCaMP calcium indicators for imaging neural  
469 populations. *bioRxiv* 2021.11.08.467793 (2021).
- 470 33. Piatkevich, K. D., Murdock, M. H. & Subach, F. V. Advances in engineering and  
471 application of optogenetic indicators for neuroscience. *Appl. Sci.* **9**, (2019).
- 472 34. Akerboom, J. *et al.* Genetically encoded calcium indicators for multi-color neural  
473 activity imaging and combination with optogenetics. *Front. Mol. Neurosci.* **6**, 1–29  
474 (2013).
- 475 35. Conti, E., Allegra Mascaro, A. & Pavone, F. Large Scale Double-Path Illumination  
476 System with Split Field of View for the All-Optical Study of Inter-and Intra-  
477 Hemispheric Functional Connectivity on Mice. *Methods Protoc.* **2**, 11 (2019).
- 478 36. Szabo, V., Ventalon, C., DeSars, V., Bradley, J. & Emiliani, V. Spatially selective  
479 holographic photoactivation and functional fluorescence imaging in freely behaving  
480 mice with a fiberscope. *Neuron* **84**, 1157–1169 (2014).
- 481 37. Wilson, N. R., Runyan, C. A., Wang, F. L. & Sur, M. Division and subtraction by distinct  
482 cortical inhibitory networks in vivo. *Nature* **488**, 343–348 (2012).
- 483 38. Zhang, F. *et al.* Multimodal fast optical interrogation of neural circuitry. *Nature* **446**,

- 484 633–639 (2007).
- 485 39. Helmbrecht, T. O., dal Maschio, M., Donovan, J. C., Koutsouli, S. & Baier, H.  
486 Topography of a Visuomotor Transformation. *Neuron* **100**, 1429–1445.e4 (2018).
- 487 40. Emiliani, V., Cohen, A. E., Deisseroth, K. & Häusser, M. All-optical interrogation of  
488 neural circuits. *J. Neurosci.* **35**, 13917–13926 (2015).
- 489 41. dal Maschio, M., Donovan, J. C., Helmbrecht, T. O. & Baier, H. Linking Neurons to  
490 Network Function and Behavior by Two-Photon Holographic Optogenetics and  
491 Volumetric Imaging. *Neuron* **94**, 774–789.e5 (2017).
- 492 42. Dal Maschio, M. *et al.* Simultaneous two-photon imaging and photo-stimulation with  
493 structured light illumination. *Opt. Express* **18**, 18720 (2010).
- 494 43. Ronzitti, E. *et al.* Recent advances in patterned photostimulation for optogenetics. *J.*  
495 *Opt. (United Kingdom)* **19**, 113001 (2017).
- 496 44. Papagiakoumou, E. Optical developments for optogenetics. *Biol. Cell* **105**, 443–464  
497 (2013).
- 498 45. Montagni, E., Resta, F., Mascaro, A. L. A. & Pavone, F. S. Optogenetics in brain  
499 research: From a strategy to investigate physiological function to a therapeutic tool.  
500 *Photonics* **6**, (2019).
- 501 46. Riemensperger, T., Kittel, R. J. & Fiala, A. Optogenetics in drosophila neuroscience.  
502 *Methods Mol. Biol.* **1408**, 167–175 (2016).
- 503 47. Liang, L. *et al.* GABAergic Projection Neurons Route Selective Olfactory Inputs to  
504 Specific Higher-Order Neurons. *Neuron* **79**, 917–931 (2013).
- 505 48. Utashiro, N., Williams, C. R., Parrish, J. Z. & Emoto, K. Prior activity of olfactory  
506 receptor neurons is required for proper sensory processing and behavior in  
507 *Drosophila* larvae. *Sci. Rep.* **8**, 1–11 (2018).
- 508 49. Blumhagen, F. *et al.* Neuronal filtering of multiplexed odour representations. *Nature*  
509 **479**, 493–498 (2011).
- 510 50. Dhawale, A. K., Hagiwara, A., Bhalla, U. S., Murthy, V. N. & Albeanu, D. F. Non-  
511 redundant odor coding by sister mitral cells revealed by light addressable glomeruli in  
512 the mouse. *Nat. Neurosci.* **13**, 1404–1412 (2010).

- 513 51. Rebello, M. R. *et al.* Perception of Odors Linked to Precise Timing in the Olfactory  
514 System. *PLoS Biol.* **12**, e1002021 (2014).
- 515 52. Gill, J. V *et al.* Precise Holographic Manipulation of Olfactory Circuits Reveals Coding  
516 Features Determining Perceptual Detection. *Neuron* **108**, 382-393.e5 (2020).
- 517 53. Dawydow, A. *et al.* Channelrhodopsin-2-XXL, a powerful optogenetic tool for low-light  
518 applications. *Proc. Natl. Acad. Sci. U. S. A.* **111**, 13972–13977 (2014).
- 519 54. Wilson, R. I. Transformation of Olfactory Representations in the Drosophila Antennal  
520 Lobe. *Science (80-. ).* **303**, 366–370 (2004).
- 521 55. Stocker, R. F., Lienhard, M. C., Borst, A. & Fischbach, K. F. Neuronal architecture of  
522 the antennal lobe in Drosophila melanogaster. *Cell Tissue Res.* **262**, 9–34 (1990).
- 523 56. Kaur, R. *et al.* Pioneer interneurons instruct bilaterality in the Drosophila olfactory  
524 sensory map. *Sci. Adv.* **5**, 1–11 (2019).
- 525 57. Riabinina, O. *et al.* Organization of olfactory centres in the malaria mosquito  
526 *Anopheles gambiae*. *Nat. Commun.* **7**, (2016).
- 527 58. Rigosi, E. *et al.* Asymmetric neural coding revealed by in vivo calcium imaging in the  
528 honey bee brain. *Proc. R. Soc. B Biol. Sci.* **282**, 20142571–20142571 (2015).
- 529 59. Ito, K. *et al.* The organization of extrinsic neurons and their implications in the  
530 functional roles of the mushroom bodies in Drosophila melanogaster meigen. *Learn.*  
531 *Mem.* **5**, 52–77 (1998).
- 532 60. Knaden, M., Strutz, A., Ahsan, J., Sachse, S. & Hansson, B. S. S. Spatial Representation  
533 of Odorant Valence in an Insect Brain. *Cell Rep.* **1**, 392–399 (2012).
- 534 61. Haverkamp, A., Hansson, B. S. & Knaden, M. Combinatorial Codes and Labeled Lines:  
535 How Insects Use Olfactory Cues to Find and Judge Food, Mates, and Oviposition Sites  
536 in Complex Environments. *Front. Physiol.* **9**, 1–8 (2018).
- 537 62. Bertolini, E. *et al.* Life at High Latitudes Does Not Require Circadian Behavioral  
538 Rhythmicity under Constant Darkness. *Curr. Biol.* **29**, 3928-3936.e3 (2019).
- 539 63. Martelli, C. & Fiala, A. Slow presynaptic mechanisms that mediate adaptation in the  
540 olfactory pathway of Drosophila. *Elife* **8**, 1–26 (2019).
- 541 64. Silbering, A. F., Bell, R., Galizia, C. G. & Benton, R. Calcium imaging of odor-evoked

542 responses in the *Drosophila* antennal lobe. *J. Vis. Exp.* 1–10 (2012) doi:10.3791/2976.

543

## 544 **Additional information**

### 545 **Availability of materials and code**

546 The program code and data are freely available at  
547 <https://github.com/MirkoZanon/OptoFluorecenceAnalysis>

### 548 **Competing interests**

549 The authors declare no competing interests.

### 550 **Authors' contributions**

551 M.Z. performed the experiments and the analysis. D.Z. engineered the *Drosophila* lines and  
552 performed immunohistochemistry. A.H. supervised the project. All the authors contributed  
553 to the design of the experiments and to the final version of the manuscript.
